# Supplementary material for: Comparison of Glioblastoma Cell Culture Platforms Based on Transcriptional Similarity with Paired Tissue
Source: MDPI journal article supplement (doi:10.3390/ph17040529), 2024-04-19
Supplement: s1 [file s1]

Supplementary Material

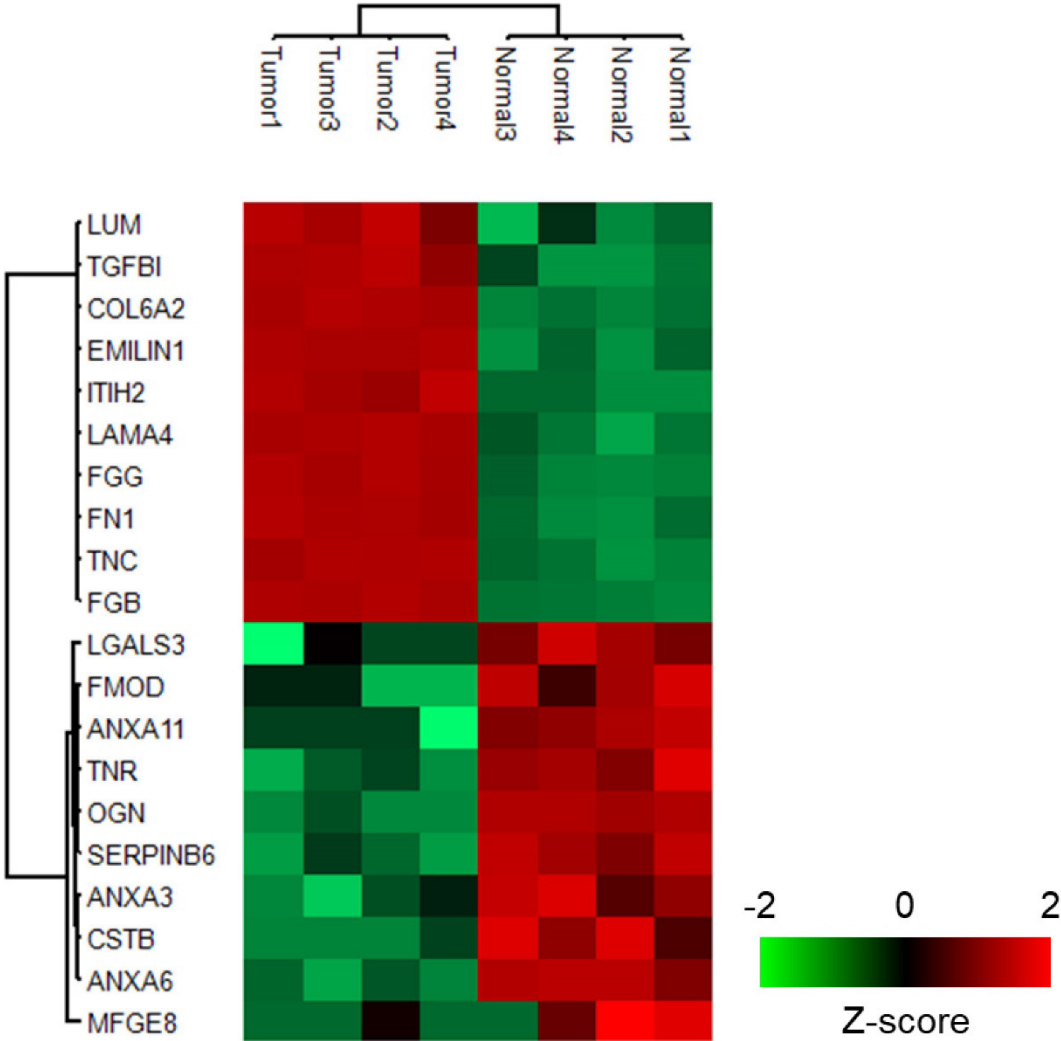

**Figure S1. Differentially expressed proteins between nECM and tECM.** Quantification of entire proteomic composition of patient-derived decellularized ECM through mass spectrometry.
