# Supplementary material for: Comparison of Glioblastoma Cell Culture Platforms Based on Transcriptional Similarity with Paired Tissue
Source: Pharmaceuticals (Basel). 2024 Apr 19;17(4):529. doi: 10.3390/ph17040529 (PMC11054899; doi:10.3390/ph17040529)
Supplement: Supplementary file 1 [file pharmaceuticals-17-00529-s001.zip › Supplementary Table S1.xlsx]

## Sheet: Table S1
Table S1. The list of GBM genes
Entrez	Symbol	Normal vs GBM
3872	KRT17	N > G
150209	AIFM3	N > G
283848	CES4A	N > G
93377	OPALIN	N > G
3798	KIF5A	N > G
23217	ZFR2	N > G
6539	SLC6A12	N > G
123283	TARSL2	N > G
4145	MATK	N > G
100128997	LOC100128997	N > G
139741	ACTRT1	N > G
282973	JAKMIP3	N > G
554235	ASPDH	N > G
440279	UNC13C	N > G
642891	LOC642891	N > G
55160	ARHGEF10L	N > G
84940	CORO6	N > G
83849	SYT15	N > G
56301	SLC7A10	N > G
285800	PRR18	N > G
219539	YPEL4	N > G
2905	GRIN2C	N > G
8911	CACNA1I	N > G
283683	LOC283683	N > G
414149	ACBD7	N > G
113177	IZUMO4	N > G
9699	RIMS2	N > G
26034	IPCEF1	N > G
10777	ARPP21	N > G
26249	KLHL3	N > G
84440	RAB11FIP4	N > G
11069	RAPGEF4	N > G
10276	NET1	N > G
3290	HSD11B1	N > G
57582	KCNT1	N > G
85442	KNDC1	N > G
5816	PVALB	N > G
105	ADARB2	N > G
9911	TMCC2	N > G
758	MPPED1	N > G
23109	DDN	N > G
4185	ADAM11	N > G
9783	RIMS3	N > G
26507	CNNM1	N > G
56666	PANX2	N > G
22874	PLEKHA6	N > G
7432	VIP	N > G
57467	HHATL	N > G
23416	KCNH3	N > G
2166	FAAH	N > G
85352	KIAA1644	N > G
653316	FAM153C	N > G
57210	SLC45A4	N > G
26038	CHD5	N > G
91768	CABLES1	N > G
9228	DLGAP2	N > G
9856	KIAA0319	N > G
7433	VIPR1	N > G
203190	LGI3	N > G
9717	SEC14L5	N > G
158038	LINGO2	N > G
26468	LHX6	N > G
441151	TMEM151B	N > G
10804	GJB6	N > G
53637	S1PR5	N > G
108	ADCY2	N > G
118663	BTBD16	N > G
54566	EPB41L4B	N > G
163255	ZNF540	N > G
4714	NDUFB8	N > G
7008	TEF	N > G
151126	ZNF385B	N > G
400745	SH2D5	N > G
25924	MYRIP	N > G
3787	KCNS1	N > G
6843	VAMP1	N > G
57460	PPM1H	N > G
56995	TULP4	N > G
729378	LOC729378	N > G
5662	PSD	N > G
10814	CPLX2	N > G
115584	SLC5A11	N > G
145773	FAM81A	N > G
23368	PPP1R13B	N > G
100128403	LOC100128403	N > G
9745	ZNF536	N > G
2051	EPHB6	N > G
57468	SLC12A5	N > G
51277	DNAJC27	N > G
84253	GARNL3	N > G
79762	C1orf115	N > G
599	BCL2L2	N > G
84968	PNMA6A	N > G
29993	PACSIN1	N > G
23492	CBX7	N > G
55530	SVOP	N > G
8999	CDKL2	N > G
50614	GALNT9	N > G
125113	KRT222	N > G
9821	RB1CC1	N > G
10361	NPM2	N > G
253982	ASPHD1	N > G
4747	NEFL	N > G
1267	CNP	N > G
6084	RNY1	N > G
23413	NCS1	N > G
11076	TPPP	N > G
89801	PPP1R3F	N > G
6262	RYR2	N > G
4741	NEFM	N > G
22849	CPEB3	N > G
157627	LINC00599	N > G
1740	DLG2	N > G
121256	TMEM132D	N > G
8326	FZD9	N > G
6334	SCN8A	N > G
10645	CAMKK2	N > G
40	ASIC2	N > G
815	CAMK2A	N > G
57338	JPH3	N > G
2563	GABRD	N > G
3356	HTR2A	N > G
4303	FOXO4	N > G
163175	LGI4	N > G
221692	PHACTR1	N > G
3736	KCNA1	N > G
200407	CREG2	N > G
84448	ABLIM2	N > G
9760	TOX	N > G
260293	CYP4X1	N > G
55753	OGDHL	N > G
4744	NEFH	N > G
6326	SCN2A	N > G
8497	PPFIA4	N > G
55321	TMEM74B	N > G
8499	PPFIA2	N > G
6579	SLCO1A2	N > G
56884	FSTL5	N > G
11122	PTPRT	N > G
2805	GOT1	N > G
2902	GRIN1	N > G
9796	PHYHIP	N > G
5745	PTH1R	N > G
6327	SCN2B	N > G
100127971	LOC100127971	N > G
25758	KIAA1549L	N > G
22941	SHANK2	N > G
55117	SLC6A15	N > G
100129076	LOC100129076	N > G
129049	SGSM1	N > G
398	ARHGDIG	N > G
9912	ARHGAP44	N > G
9840	TESPA1	N > G
79641	ROGDI	N > G
27445	PCLO	N > G
30815	ST6GALNAC6	N > G
26051	PPP1R16B	N > G
10368	CACNG3	N > G
419	ART3	N > G
9185	REPS2	N > G
5649	RELN	N > G
58157	NGB	N > G
26220	DGCR5	N > G
23261	CAMTA1	N > G
114299	PALM2	N > G
4209	MEF2D	N > G
9256	TSPOAP1	N > G
85358	SHANK3	N > G
22891	ZNF365	N > G
5136	PDE1A	N > G
2912	GRM2	N > G
283078	MKX	N > G
64850	ETNPPL	N > G
26289	AK5	N > G
885	CCK	N > G
9922	IQSEC1	N > G
114800	CCDC85A	N > G
5522	PPP2R2C	N > G
770	CA11	N > G
8630	HSD17B6	N > G
55294	FBXW7	N > G
9145	SYNGR1	N > G
3745	KCNB1	N > G
10815	CPLX1	N > G
2036	EPB41L1	N > G
25830	SULT4A1	N > G
6775	STAT4	N > G
403	ARL3	N > G
84446	BRSK1	N > G
8927	BSN	N > G
1032	CDKN2D	N > G
23551	RASD2	N > G
9118	INA	N > G
2039	DMTN	N > G
2060	EPS15	N > G
29944	PNMA3	N > G
2555	GABRA2	N > G
23620	NTSR2	N > G
50632	CALY	N > G
4208	MEF2C	N > G
134548	SOWAHA	N > G
51361	HOOK1	N > G
818	CAMK2G	N > G
128218	TMEM125	N > G
9891	NUAK1	N > G
56904	SH3GLB2	N > G
1123	CHN1	N > G
5348	FXYD1	N > G
649970	LOC649970	N > G
57628	DPP10	N > G
55799	CACNA2D3	N > G
118442	GPR62	N > G
9811	CTIF	N > G
9053	MAP7	N > G
56924	PAK6	N > G
140767	NRSN1	N > G
54715	RBFOX1	N > G
491	ATP2B2	N > G
762	CA4	N > G
22802	CLCA4	N > G
84502	JPH4	N > G
23387	SIK3	N > G
259217	HSPA12A	N > G
54438	GFOD1	N > G
64168	NECAB1	N > G
348094	ANKDD1A	N > G
83699	SH3BGRL2	N > G
492311	IGIP	N > G
23316	CUX2	N > G
60370	AVPI1	N > G
51704	GPRC5B	N > G
63908	NAPB	N > G
5590	PRKCZ	N > G
6457	SH3GL3	N > G
7447	VSNL1	N > G
654320	SNORA8	N > G
5581	PRKCE	N > G
122970	ACOT4	N > G
8291	DYSF	N > G
23077	MYCBP2	N > G
147381	CBLN2	N > G
10900	RUNDC3A	N > G
170961	ANKRD24	N > G
9853	RUSC2	N > G
7163	TPD52	N > G
2913	GRM3	N > G
23096	IQSEC2	N > G
5502	PPP1R1A	N > G
10284	SAP18	N > G
196047	EMX2OS	N > G
5860	QDPR	N > G
51555	PEX5L	N > G
57030	SLC17A7	N > G
340554	ZC3H12B	N > G
23349	PHF24	N > G
1408	CRY2	N > G
3419	IDH3A	N > G
3706	ITPKA	N > G
23207	PLEKHM2	N > G
2572	GAD2	N > G
125875	CLDND2	N > G
79085	SLC25A23	N > G
3800	KIF5C	N > G
9645	MICAL2	N > G
1742	DLG4	N > G
9762	LZTS3	N > G
23031	MAST3	N > G
284111	SLC13A5	N > G
338328	GPIHBP1	N > G
2746	GLUD1	N > G
26030	PLEKHG3	N > G
54842	MFSD6	N > G
6543	SLC8A2	N > G
146330	FBXL16	N > G
256714	MAP7D2	N > G
29091	STXBP6	N > G
887	CCKBR	N > G
85004	RERG	N > G
114876	OSBPL1A	N > G
6853	SYN1	N > G
5532	PPP3CB	N > G
23285	KIAA1107	N > G
6623	SNCG	N > G
7881	KCNAB1	N > G
6833	ABCC8	N > G
1128	CHRM1	N > G
1759	DNM1	N > G
56977	STOX2	N > G
529	ATP6V1E1	N > G
9899	SV2B	N > G
9071	CLDN10	N > G
202134	FAM153B	N > G
9556	C14orf2	N > G
23263	MCF2L	N > G
3131	HLF	N > G
26047	CNTNAP2	N > G
5414	SEPT4	N > G
2775	GNAO1	N > G
84926	SPRYD3	N > G
56675	NRIP3	N > G
9764	KIAA0513	N > G
9751	SNPH	N > G
25837	RAB26	N > G
139065	SLITRK4	N > G
122416	ANKRD9	N > G
57718	PPP4R4	N > G
127262	TPRG1L	N > G
10732	TCFL5	N > G
8925	HERC1	N > G
57172	CAMK1G	N > G
116988	AGAP3	N > G
23542	MAPK8IP2	N > G
23154	NCDN	N > G
6616	SNAP25	N > G
9892	SNAP91	N > G
84251	SGIP1	N > G
1113	CHGA	N > G
57692	MAGEE1	N > G
55212	BBS7	N > G
132332	TMEM155	N > G
6857	SYT1	N > G
124976	SPNS2	N > G
79785	RERGL	N > G
79956	ERMP1	N > G
154661	RUNDC3B	N > G
53822	FXYD7	N > G
4987	OPRL1	N > G
387923	SERP2	N > G
119391	GSTO2	N > G
3763	KCNJ6	N > G
5274	SERPINI1	N > G
23040	MYT1L	N > G
79957	PAQR6	N > G
57595	PDZD4	N > G
8566	PDXK	N > G
1124	CHN2	N > G
4900	NRGN	N > G
9252	RPS6KA5	N > G
6854	SYN2	N > G
6323	SCN1A	N > G
222865	TMEM130	N > G
2744	GLS	N > G
4336	MOBP	N > G
5305	PIP4K2A	N > G
11141	IL1RAPL1	N > G
114815	SORCS1	N > G
84735	CNDP1	N > G
5595	MAPK3	N > G
7781	SLC30A3	N > G
63982	ANO3	N > G
51046	ST8SIA3	N > G
9066	SYT7	N > G
6096	RORB	N > G
129285	PPP1R21	N > G
23768	FLRT2	N > G
494514	TYMSOS	N > G
81571	MIR600HG	N > G
8601	RGS20	N > G
85445	CNTNAP4	N > G
81563	C1orf21	N > G
3708	ITPR1	N > G
5138	PDE2A	N > G
5058	PAK1	N > G
116362	RBP7	N > G
22841	RAB11FIP2	N > G
1646	AKR1C2	N > G
10653	SPINT2	N > G
23095	KIF1B	N > G
57698	SHTN1	N > G
23017	FAIM2	N > G
3761	KCNJ4	N > G
2550	GABBR1	N > G
51440	HPCAL4	N > G
57571	CARNS1	N > G
6000	RGS7	N > G
2262	GPC5	N > G
10395	DLC1	N > G
11033	ADAP1	N > G
54958	TMEM160	N > G
64130	LIN7B	N > G
2254	FGF9	N > G
100134265	LOC100134265	N > G
3705	ITPK1	N > G
1016	CDH18	N > G
56970	ATXN7L3	N > G
57475	PLEKHH1	N > G
84152	PPP1R1B	N > G
139728	PNCK	N > G
55323	LARP6	N > G
4329	ALDH6A1	N > G
132204	SYNPR	N > G
6506	SLC1A2	N > G
145581	LRFN5	N > G
90249	UNC5A	N > G
221074	SLC39A12	N > G
27069	GHITM	N > G
57586	SYT13	N > G
9651	PLCH2	N > G
5579	PRKCB	N > G
53844	COPG2IT1	N > G
59338	PLEKHA1	N > G
54806	AHI1	N > G
27175	TUBG2	N > G
10810	WASF3	N > G
51062	ATL1	N > G
10858	CYP46A1	N > G
2562	GABRB3	N > G
6620	SNCB	N > G
9499	MYOT	N > G
57165	GJC2	N > G
343990	KIAA1211L	N > G
56978	PRDM8	N > G
80863	PRRT1	N > G
56899	ANKS1B	N > G
2018	EMX2	N > G
4248	MGAT3	N > G
90990	KIFC2	N > G
10193	RNF41	N > G
5789	PTPRD	N > G
388662	SLC6A17	N > G
375704	ENHO	N > G
4130	MAP1A	N > G
79012	CAMKV	N > G
6844	VAMP2	N > G
8736	MYOM1	N > G
84530	SRRM4	N > G
137872	ADHFE1	N > G
26052	DNM3	N > G
6319	SCD	N > G
84532	ACSS1	N > G
6305	SBF1	N > G
80034	CSRNP3	N > G
6086	RNY4	N > G
128434	VSTM2L	N > G
2947	GSTM3	N > G
388394	RPRML	N > G
23710	GABARAPL1	N > G
219749	ZNF25	N > G
23466	CBX6	N > G
51560	RAB6B	N > G
163882	CNST	N > G
22998	LIMCH1	N > G
6860	SYT4	N > G
5625	PRODH	N > G
6456	SH3GL2	N > G
23108	RAP1GAP2	N > G
64753	CCDC136	N > G
440823	MIAT	N > G
5178	PEG3	N > G
4118	MAL	N > G
26232	FBXO2	N > G
56603	CYP26B1	N > G
440081	DDX12P	N > G
10891	PPARGC1A	N > G
534	ATP6V1G2	N > G
1620	BRINP1	N > G
548596	CKMT1A	N > G
6622	SNCA	N > G
26999	CYFIP2	N > G
1040	CDS1	N > G
4905	NSF	N > G
10079	ATP9A	N > G
79844	ZDHHC11	N > G
10888	GPR83	N > G
51286	CEND1	N > G
57447	NDRG2	N > G
745	MYRF	N > G
5297	PI4KA	N > G
140679	SLC32A1	N > G
147906	DACT3	N > G
83733	SLC25A18	N > G
112476	PRRT2	N > G
83698	CALN1	N > G
3208	HPCA	N > G
202151	RANBP3L	N > G
9211	LGI1	N > G
3831	KLC1	N > G
116154	PHACTR3	N > G
114798	SLITRK1	N > G
399947	C11orf87	N > G
10170	DHRS9	N > G
9771	RAPGEF5	N > G
4155	MBP	N > G
9728	SECISBP2L	N > G
23171	GPD1L	N > G
5638	PRRG1	N > G
10966	RAB40B	N > G
2261	FGFR3	N > G
10231	RCAN2	N > G
274	BIN1	N > G
6271	S100A1	N > G
443	ASPA	N > G
401190	RGS7BP	N > G
816	CAMK2B	N > G
6750	SST	N > G
8502	PKP4	N > G
10313	RTN3	N > G
104	ADARB1	N > G
138046	RALYL	N > G
93664	CADPS2	N > G
5101	PCDH9	N > G
9920	KBTBD11	N > G
9743	ARHGAP32	N > G
2675	GFRA2	N > G
54472	TOLLIP	N > G
9362	CPNE6	N > G
2566	GABRG2	N > G
9644	SH3PXD2A	N > G
222166	MTURN	N > G
4942	OAT	N > G
57185	NIPAL3	N > G
2785	GNG3	N > G
94015	TTYH2	N > G
6855	SYP	N > G
79038	ZFYVE21	N > G
4815	NINJ2	N > G
6804	STX1A	N > G
23057	NMNAT2	N > G
5602	MAPK10	N > G
5621	PRNP	N > G
79929	MAP6D1	N > G
56895	AGPAT4	N > G
29767	TMOD2	N > G
7704	ZBTB16	N > G
23236	PLCB1	N > G
10247	RIDA	N > G
26059	ERC2	N > G
57026	PDXP	N > G
64061	TSPYL2	N > G
10507	SEMA4D	N > G
64077	LHPP	N > G
127254	ERICH3	N > G
10188	TNK2	N > G
5168	ENPP2	N > G
4974	OMG	N > G
25777	SUN2	N > G
192683	SCAMP5	N > G
8786	RGS11	N > G
55652	SLC48A1	N > G
261729	STEAP2	N > G
113802	HENMT1	N > G
20	ABCA2	N > G
11041	B4GAT1	N > G
146223	CMTM4	N > G
535	ATP6V0A1	N > G
6529	SLC6A1	N > G
9353	SLIT2	N > G
256472	TMEM151A	N > G
25791	NGEF	N > G
6695	SPOCK1	N > G
577	ADGRB3	N > G
80303	EFHD1	N > G
100113407	TMEM170B	N > G
217	ALDH2	N > G
4978	OPCML	N > G
8681	JMJD7-PLA2G4B	N > G
84504	NKX6-2	N > G
5909	RAP1GAP	N > G
10299	MARCH6	N > G
55861	DBNDD2	N > G
266812	NAP1L5	N > G
221061	FAM171A1	N > G
4134	MAP4	N > G
114928	GPRASP2	N > G
219738	C10orf35	N > G
6711	SPTBN1	N > G
148014	TTC9B	N > G
135112	NCOA7	N > G
6900	CNTN2	N > G
29114	TAGLN3	N > G
2257	FGF12	N > G
30818	KCNIP3	N > G
9905	SGSM2	N > G
9079	LDB2	N > G
64423	INF2	N > G
64112	MOAP1	N > G
162494	RHBDL3	N > G
5064	PALM	N > G
56660	KCNK12	N > G
51090	PLLP	N > G
55314	TMEM144	N > G
6785	ELOVL4	N > G
731835	LOC731835	N > G
3306	HSPA2	N > G
23136	EPB41L3	N > G
8537	BCAS1	N > G
1734	DIO2	N > G
801	CALM1	N > G
23205	ACSBG1	N > G
1346	COX7A1	N > G
825	CAPN3	N > G
6638	SNRPN	N > G
23162	MAPK8IP3	N > G
4062	LY6H	N > G
784	CACNB3	N > G
27087	B3GAT1	N > G
126823	KLHDC9	N > G
28996	HIPK2	N > G
8522	GAS7	N > G
57084	SLC17A6	N > G
219287	AMER2	N > G
333	APLP1	N > G
78986	DUSP26	N > G
55466	DNAJA4	N > G
7164	TPD52L1	N > G
158931	TCEAL6	N > G
6640	SNTA1	N > G
85315	PAQR8	N > G
83641	FAM107B	N > G
2571	GAD1	N > G
107	ADCY1	N > G
481	ATP1B1	N > G
7301	TYRO3	N > G
6812	STXBP1	N > G
56650	CLDND1	N > G
22924	MAPRE3	N > G
54769	DIRAS2	N > G
342977	NANOS3	N > G
26012	NSMF	N > G
794	CALB2	N > G
340542	BEX5	N > G
55800	SCN3B	N > G
51617	NSG2	N > G
83719	YPEL3	N > G
27319	BHLHE22	N > G
55384	MEG3	N > G
643031	MTND5P10	N > G
10974	ADIRF	N > G
81551	STMN4	N > G
116173	CMTM5	N > G
57471	ERMN	N > G
6252	RTN1	N > G
3241	HPCAL1	N > G
252995	FNDC5	N > G
4675	NAP1L3	N > G
50649	ARHGEF4	N > G
84688	C9orf24	N > G
9701	PPP6R2	N > G
4884	NPTX1	N > G
7259	TSPYL1	N > G
65009	NDRG4	N > G
114794	ELFN2	N > G
4099	MAG	N > G
1902	LPAR1	N > G
94274	PPP1R14A	N > G
2560	GABRB1	N > G
83988	NCALD	N > G
352954	GATS	N > G
114783	LMTK3	N > G
58473	PLEKHB1	N > G
4340	MOG	N > G
3785	KCNQ2	N > G
100130835	LOC100130835	N > G
342865	VSTM2B	N > G
1780	DYNC1I1	N > G
10150	MBNL2	N > G
11189	CELF3	N > G
2891	GRIA2	N > G
5999	RGS4	N > G
1850	DUSP8	N > G
140885	SIRPA	N > G
8120	AP3B2	N > G
389084	C2orf82	N > G
4137	MAPT	N > G
8605	PLA2G4C	N > G
375775	PNPLA7	N > G
3775	KCNK1	N > G
51310	SLC22A17	N > G
3983	ABLIM1	N > G
5121	PCP4	N > G
6563	SLC14A1	N > G
9844	ELMO1	N > G
342035	GLDN	N > G
26834	RNU4-2	N > G
440270	GOLGA8B	N > G
6263	RYR3	N > G
618	BCYRN1	N > G
5413	SEPT5	N > G
57611	ISLR2	N > G
50863	NTM	N > G
2788	GNG7	N > G
55450	CAMK2N1	N > G
8851	CDK5R1	N > G
51700	CYB5R2	N > G
285093	RTP5	N > G
100130516	LOC100130516	N > G
273	AMPH	N > G
25789	TMEM59L	N > G
84466	MEGF10	N > G
338758	ATP2B1-AS1	N > G
23500	DAAM2	N > G
23037	PDZD2	N > G
56967	C14orf132	N > G
154796	AMOT	N > G
5730	PTGDS	N > G
84249	PSD2	N > G
216	ALDH1A1	N > G
84707	BEX2	N > G
54014	BRWD1	N > G
154215	NKAIN2	N > G
9901	SRGAP3	N > G
1917	EEF1A2	N > G
53342	IL17D	N > G
547	KIF1A	N > G
7466	WFS1	N > G
55885	LMO3	N > G
100008588	RNA18SN5	N > G
1114	CHGB	N > G
1995	ELAVL3	N > G
26580	BSCL2	N > G
1318	SLC31A2	N > G
10439	OLFM1	N > G
5653	KLK6	N > G
8618	CADPS	N > G
84894	LINGO1	N > G
10633	RASL10A	N > G
9568	GABBR2	N > G
441763	LOC441763	N > G
10486	CAP2	N > G
1465	CSRP1	N > G
10382	TUBB4A	N > G
80333	KCNIP4	N > G
477	ATP1A2	N > G
7018	TF	N > G
7102	TSPAN7	N > G
11075	STMN2	N > G
400916	CHCHD10	N > G
23242	COBL	N > G
56934	CA10	N > G
56271	BEX4	N > G
388135	C15orf59	N > G
29106	SCG3	N > G
4128	MAOA	N > G
57452	GALNT16	N > G
4495	MT1G	N > G
9355	LHX2	N > G
2026	ENO2	N > G
84984	CEP19	N > G
55775	TDP1	N > G
58476	TP53INP2	N > G
692084	SNORD13	N > G
9283	GPR37L1	N > G
23671	TMEFF2	N > G
26470	SEZ6L2	N > G
1573	CYP2J2	N > G
4852	NPY	N > G
80164	PRR36	N > G
4753	NELL2	N > G
1008	CDH10	N > G
230	ALDOC	N > G
9201	DCLK1	N > G
729978	NPIPB2	N > G
56475	RPRM	N > G
5798	PTPRN	N > G
6447	SCG5	N > G
2861	GPR37	N > G
54843	SYTL2	N > G
10418	SPON1	N > G
10409	BASP1	N > G
25849	PARM1	N > G
28984	RGCC	N > G
4915	NTRK2	N > G
5166	PDK4	N > G
140597	TCEAL2	N > G
5354	PLP1	N > G
255031	LINC00957	N > G
55964	SEPT3	N > G
11170	FAM107A	N > G
7122	CLDN5	N > G
55859	BEX1	N > G
347	APOD	N > G
9723	SEMA3E	N > G
24141	LAMP5	N > G
26022	TMEM98	N > G
388585	HES5	N > G
100128288	LOC100128288	N > G
6035	RNASE1	N > G
6663	SOX10	N > G
4604	MYBPC1	N > G
4499	MT1M	N > G
9452	ITM2A	N > G
4504	MT3	N > G
5010	CLDN11	N > G
633	BGN	N < G
2318	FLNC	N < G
3543	IGLL1	N < G
972	CD74	N < G
714	C1QC	N < G
3138	HLA-K	N < G
241	ALOX5AP	N < G
100133941	CD24	N < G
3122	HLA-DRA	N < G
968	CD68	N < G
3689	ITGB2	N < G
3113	HLA-DPA1	N < G
730415	LOC730415	N < G
283120	H19	N < G
3569	IL6	N < G
6280	S100A9	N < G
7805	LAPTM5	N < G
3303	HSPA1A	N < G
1490	CTGF	N < G
5997	RGS2	N < G
10882	C1QL1	N < G
100133678	LOC100133678	N < G
3128	HLA-DRB6	N < G
1601	DAB2	N < G
3126	HLA-DRB4	N < G
11013	TMSB15A	N < G
4015	LOX	N < G
7169	TPM2	N < G
114897	C1QTNF1	N < G
28951	TRIB2	N < G
4060	LUM	N < G
3117	HLA-DQA1	N < G
713	C1QB	N < G
5327	PLAT	N < G
467	ATF3	N < G
929	CD14	N < G
1293	COL6A3	N < G
4147	MATN2	N < G
79191	IRX3	N < G
402644	PPIAP80	N < G
2207	FCER1G	N < G
4023	LPL	N < G
26577	PCOLCE2	N < G
729009	FTH1P20	N < G
768	CA9	N < G
1959	EGR2	N < G
10253	SPRY2	N < G
641768	LOC641768	N < G
4239	MFAP4	N < G
25878	MXRA5	N < G
58475	MS4A7	N < G
441377	RPS26P35	N < G
115908	CTHRC1	N < G
3598	IL13RA2	N < G
56892	C8orf4	N < G
123	PLIN2	N < G
645979	RPS26P31	N < G
8835	SOCS2	N < G
7057	THBS1	N < G
716	C1S	N < G
1292	COL6A2	N < G
2501	FTH1P8	N < G
10457	GPNMB	N < G
857	CAV1	N < G
100132291	RPS27P29	N < G
4318	MMP9	N < G
3491	CYR61	N < G
5803	PTPRZ1	N < G
92755	TUBBP1	N < G
2353	FOS	N < G
6588	SLN	N < G
1843	DUSP1	N < G
440063	LOC440063	N < G
9518	GDF15	N < G
23166	STAB1	N < G
81848	SPRY4	N < G
4085	MAD2L1	N < G
389289	ANXA2R	N < G
100132863	HMGB1P37	N < G
1277	COL1A1	N < G
9055	PRC1	N < G
128192	PPIAP35	N < G
1075	CTSC	N < G
729086	LOC729086	N < G
5307	PITX1	N < G
165	AEBP1	N < G
2504	FTH1P12	N < G
100129028	RPLP1P4	N < G
341	APOC1	N < G
2	A2M	N < G
388574	RPL23AP87	N < G
3576	CXCL8	N < G
7117	TMSB4XP8	N < G
3912	LAMB1	N < G
392285	PPIAP33	N < G
5996	RGS1	N < G
7298	TYMS	N < G
3487	IGFBP4	N < G
10561	IFI44	N < G
286527	TMSB15B	N < G
100129742	LOC100129742	N < G
1163	CKS1B	N < G
8337	HIST2H2AA3	N < G
642828	RPL6P10	N < G
7422	VEGFA	N < G
2217	FCGRT	N < G
1289	COL5A1	N < G
1295	COL8A1	N < G
644774	LOC644774	N < G
5118	PCOLCE	N < G
72	ACTG2	N < G
4214	MAP3K1	N < G
51155	HN1	N < G
1281	COL3A1	N < G
1462	VCAN	N < G
8614	STC2	N < G
5054	SERPINE1	N < G
26271	FBXO5	N < G
645138	LOC645138	N < G
3310	HSPA6	N < G
147841	SPC24	N < G
196410	METTL7B	N < G
6464	SHC1	N < G
55220	KLHDC8A	N < G
389787	TPT1P9	N < G
3337	DNAJB1	N < G
6175	RPLP0	N < G
8714	ABCC3	N < G
10437	IFI30	N < G
8805	TRIM24	N < G
3202	HOXA5	N < G
6664	SOX11	N < G
391833	RPS10P11	N < G
157506	RDH10	N < G
10644	IGF2BP2	N < G
9332	CD163	N < G
1052	CEBPD	N < G
7035	TFPI	N < G
7079	TIMP4	N < G
10643	IGF2BP3	N < G
6234	RPS28	N < G
51659	GINS2	N < G
3221	HOXC4	N < G
23643	LY96	N < G
1848	DUSP6	N < G
646785	RPS10P13	N < G
649553	LOC649553	N < G
64231	MS4A6A	N < G
4837	NNMT	N < G
1958	EGR1	N < G
10728	PTGES3	N < G
56999	ADAMTS9	N < G
9123	SLC16A3	N < G
726	CAPN5	N < G
11339	OIP5	N < G
1290	COL5A2	N < G
8463	TEAD2	N < G
7412	VCAM1	N < G
3151	HMGN2	N < G
3833	KIFC1	N < G
1291	COL6A1	N < G
100134073	LOC100134073	N < G
1117	CHI3L2	N < G
1890	TYMP	N < G
4192	MDK	N < G
1278	COL1A2	N < G
113130	CDCA5	N < G
648024	LOC648024	N < G
285	ANGPT2	N < G
7538	ZFP36	N < G
64943	NT5DC2	N < G
3426	CFI	N < G
11167	FSTL1	N < G
57216	VANGL2	N < G
79022	TMEM106C	N < G
148915	LOC148915	N < G
8520	HAT1	N < G
54435	HCG4	N < G
27295	PDLIM3	N < G
715	C1R	N < G
6347	CCL2	N < G
100134134	LOC100134134	N < G
4267	CD99	N < G
55872	PBK	N < G
5351	PLOD1	N < G
390	RND3	N < G
3659	IRF1	N < G
3135	HLA-G	N < G
57190	SELENON	N < G
22974	TPX2	N < G
56975	FAM20C	N < G
29128	UHRF1	N < G
388654	LOC388654	N < G
1841	DTYMK	N < G
19	ABCA1	N < G
6781	STC1	N < G
64855	FAM129B	N < G
3488	IGFBP5	N < G
10135	NAMPT	N < G
1903	S1PR3	N < G
6678	SPARC	N < G
3486	IGFBP3	N < G
6890	TAP1	N < G
7913	DEK	N < G
360132	FKBP9P1	N < G
5627	PROS1	N < G
10970	CKAP4	N < G
8914	TIMELESS	N < G
5328	PLAU	N < G
3148	HMGB2	N < G
8857	FCGBP	N < G
57007	ACKR3	N < G
25907	TMEM158	N < G
771	CA12	N < G
54478	FAM64A	N < G
7494	XBP1	N < G
5630	PRPH	N < G
8985	PLOD3	N < G
390354	RPL18AP3	N < G
29923	HILPDA	N < G
259266	ASPM	N < G
10130	PDIA6	N < G
728820	RPL29P15	N < G
1875	E2F5	N < G
27286	SRPX2	N < G
28969	BZW2	N < G
4828	NMB	N < G
8318	CDC45	N < G
150468	CKAP2L	N < G
9212	AURKB	N < G
1116	CHI3L1	N < G
7351	UCP2	N < G
23480	SEC61G	N < G
9349	RPL23	N < G
143888	KDELC2	N < G
25987	TSKU	N < G
308	ANXA5	N < G
140576	S100A16	N < G
4171	MCM2	N < G
59	ACTA2	N < G
3956	LGALS1	N < G
55165	CEP55	N < G
90853	SPOCD1	N < G
1009	CDH11	N < G
1870	E2F2	N < G
6657	SOX2	N < G
2633	GBP1	N < G
1063	CENPF	N < G
100132673	RPS2P28	N < G
646531	YBX1P2	N < G
54504	CPVL	N < G
79690	GAL3ST4	N < G
3162	HMOX1	N < G
10252	SPRY1	N < G
3678	ITGA5	N < G
51474	LIMA1	N < G
55603	FAM46A	N < G
7852	CXCR4	N < G
3134	HLA-F	N < G
2634	GBP2	N < G
837	CASP4	N < G
51192	CKLF	N < G
10051	SMC4	N < G
55240	STEAP3	N < G
26511	CHIC2	N < G
3315	HSPB1	N < G
10112	KIF20A	N < G
730010	BRI3P1	N < G
1466	CSRP2	N < G
22918	CD93	N < G
26472	PPP1R14B	N < G
3106	HLA-B	N < G
10459	MAD2L2	N < G
3399	ID3	N < G
5352	PLOD2	N < G
836	CASP3	N < G
85441	HELZ2	N < G
647285	RPL29P9	N < G
590	BCHE	N < G
83879	CDCA7	N < G
29121	CLEC2D	N < G
7837	PXDN	N < G
644039	LOC644039	N < G
6275	S100A4	N < G
548644	POLR2J3	N < G
6659	SOX4	N < G
4256	MGP	N < G
9833	MELK	N < G
7105	TSPAN6	N < G
6790	AURKA	N < G
12	SERPINA3	N < G
643253	CCT6P1	N < G
54809	SAMD9	N < G
728126	RPSAP30	N < G
116496	FAM129A	N < G
9334	B4GALT5	N < G
11118	BTN3A2	N < G
6648	SOD2	N < G
960	CD44	N < G
57664	PLEKHA4	N < G
991	CDC20	N < G
6746	SSR2	N < G
9133	CCNB2	N < G
387763	C11orf96	N < G
55504	TNFRSF19	N < G
730278	LOC730278	N < G
8406	SRPX	N < G
80381	CD276	N < G
402251	LOC402251	N < G
677	ZFP36L1	N < G
728672	LOC728672	N < G
1647	GADD45A	N < G
64151	NCAPG	N < G
567	B2M	N < G
1316	KLF6	N < G
5932	RBBP8	N < G
332	BIRC5	N < G
1284	COL4A2	N < G
4953	ODC1	N < G
3091	HIF1A	N < G
6277	S100A6	N < G
3136	HLA-H	N < G
2632	GBE1	N < G
1026	CDKN1A	N < G
203068	TUBB	N < G
5111	PCNA	N < G
3181	HNRNPA2B1	N < G
56245	C21orf62	N < G
100131387	RPL39P32	N < G
1809	DPYSL3	N < G
3417	IDH1	N < G
64778	FNDC3B	N < G
134997	PPIAP29	N < G
24147	FJX1	N < G
10630	PDPN	N < G
85236	HIST1H2BK	N < G
8460	TPST1	N < G
644615	LOC644615	N < G
58516	FAM60A	N < G
7041	TGFB1I1	N < G
3987	LIMS1	N < G
3428	IFI16	N < G
84617	TUBB6	N < G
800	CALD1	N < G
6282	S100A11	N < G
112597	CYTOR	N < G
3915	LAMC1	N < G
2896	GRN	N < G
100128410	NPM1P34	N < G
391656	RPS15AP17	N < G
5033	P4HA1	N < G
25932	CLIC4	N < G
5696	PSMB8	N < G
56265	CPXM1	N < G
90007	MIDN	N < G
4609	MYC	N < G
100132992	HMGN1P30	N < G
116372	LYPD1	N < G
7132	TNFRSF1A	N < G
6185	RPN2	N < G
133	ADM	N < G
6993	DYNLT1	N < G
5396	PRRX1	N < G
440359	YBX3P1	N < G
10950	BTG3	N < G
441032	EEF1A1P9	N < G
10797	MTHFD2	N < G
1019	CDK4	N < G
29107	NXT1	N < G
5782	PTPN12	N < G
7045	TGFBI	N < G
9540	TP53I3	N < G
728698	EIF4A1P4	N < G
7465	WEE1	N < G
646819	RPS15AP19	N < G
2012	EMP1	N < G
730740	LOC730740	N < G
3725	JUN	N < G
100132457	LOC100132457	N < G
813	CALU	N < G
303	ANXA2P1	N < G
8819	SAP30	N < G
4478	MSN	N < G
645715	EEF1A1P24	N < G
63901	FAM111A	N < G
7873	MANF	N < G
967	CD63	N < G
11014	KDELR2	N < G
871	SERPINH1	N < G
26255	PTTG3P	N < G
7153	TOP2A	N < G
2882	GPX7	N < G
51203	NUSAP1	N < G
151579	BZW1P2	N < G
58505	OSTC	N < G
5725	PTBP1	N < G
10763	NES	N < G
5836	PYGL	N < G
6472	SHMT2	N < G
29927	SEC61A1	N < G
83931	STK40	N < G
286444	RPS2P55	N < G
25798	BRI3	N < G
11065	UBE2C	N < G
1650	DDOST	N < G
10549	PRDX4	N < G
1164	CKS2	N < G
3939	LDHA	N < G
4170	MCL1	N < G
51330	TNFRSF12A	N < G
5954	RCN1	N < G
694	BTG1	N < G
9470	EIF4E2	N < G
9213	XPR1	N < G
2014	EMP3	N < G
6187	RPS2	N < G
5216	PFN1	N < G
170954	PPP1R18	N < G
5034	P4HB	N < G
9232	PTTG1	N < G
7791	ZYX	N < G
8531	YBX3	N < G
84817	TXNDC17	N < G
4904	YBX1	N < G
3485	IGFBP2	N < G
22822	PHLDA1	N < G
3105	HLA-A	N < G
278	AMY1C	N < G
1017	CDK2	N < G
440589	RPS2P8	N < G
301	ANXA1	N < G
391075	GAPDHP23	N < G
440915	POTEKP	N < G
54732	TMED9	N < G
6281	S100A10	N < G
8407	TAGLN2	N < G
1973	EIF4A1	N < G
10212	DDX39A	N < G
10092	ARPC5	N < G
7050	TGIF1	N < G
649049	LOC649049	N < G
646294	RPS2P29	N < G
3654	IRAK1	N < G
3371	TNC	N < G
441013	RPS2P21	N < G
148430	LOC148430	N < G
729679	RPS2P51	N < G
400963	RPS2P17	N < G
645173	RPS2P48	N < G
29097	CNIH4	N < G
10952	SEC61B	N < G
389	RHOC	N < G
1282	COL4A1	N < G
1192	CLIC1	N < G
343184	RPS2P11	N < G
123920	CMTM3	N < G
7076	TIMP1	N < G
302	ANXA2	N < G
977	CD151	N < G
55013	MCUB	N < G
7431	VIM	N < G
